# Supplementary material
Source: Springer Nature journal article supplement (https://www.springermedizin.de/resource/supplementary/12986_2011_333_MOESM1_ESM.pdf/25655858)

**A**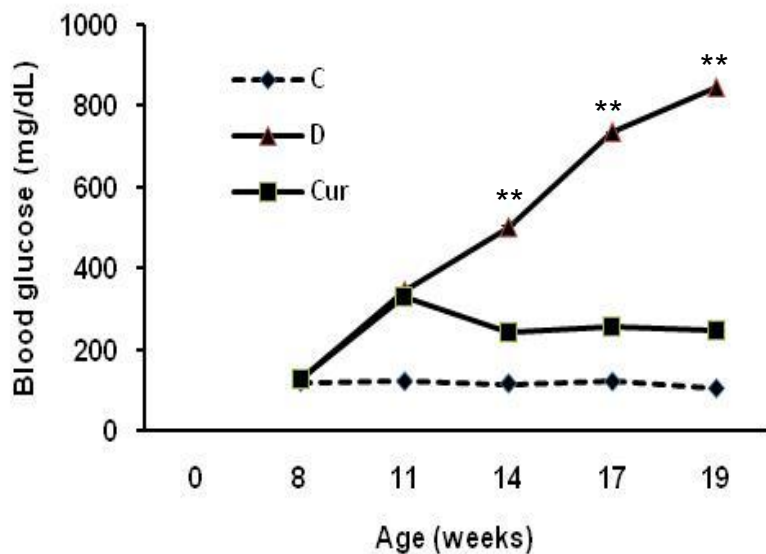**B**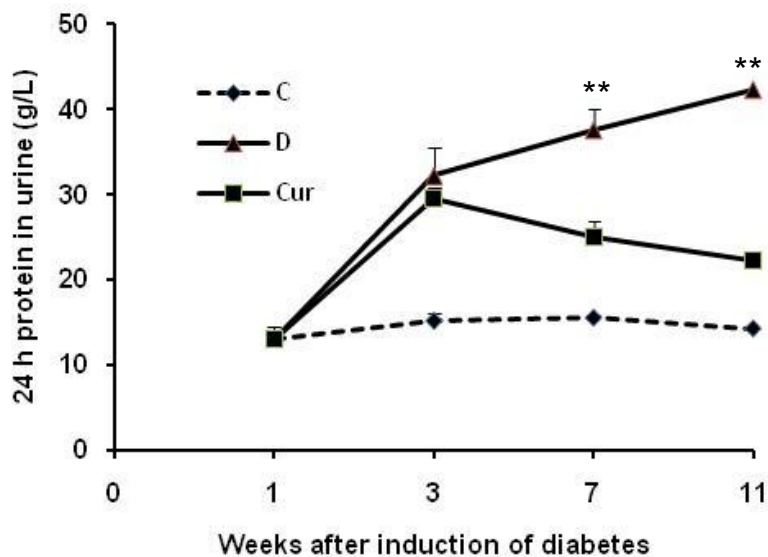

Supplement: MOESM1 [file 25655858]
